# Supplementary material for: Dithiocarbamate transfer reaction from methylene-bis(dithiocarbamates) to molybdenum dithiocarbamates in engine lubricants investigated using laboratory experiments
Source: Royal Society of Chemistry journal article supplement (doi:10.1039/d2nj04123e), 2022-01-01

## Electronic Supplementary Information

### Dithiocarbamate transfer reaction from methylene-*bis*-(dithiocarbamates) to molybdenum dithiocarbamates in engine lubricants investigated using laboratory experiments

Y.M. Kiw,<sup>a,b</sup> P. Schaeffer,<sup>a</sup> P. Adam,<sup>a\*</sup> B. Thiébaud,<sup>b</sup> C. Boyer<sup>b</sup>

<sup>a</sup> University of Strasbourg, CNRS, Institut de Chimie de Strasbourg UMR 7177, F-67000 Strasbourg, France

<sup>b</sup> TotalEnergies Solaize Research Center, BP22-69360 Cedex, France

### Supplementary Materials

**Figure S1:** Reference NMR spectra (CDCl<sub>3</sub>) of MBDTC **3a** **(a)** <sup>1</sup>H-NMR spectrum (0.5-7.5 ppm, 500 MHz); **(b)** <sup>13</sup>C-NMR spectrum (0-220 ppm, 125 MHz). \*: Impurities.

**Figure S2:** Reference NMR spectra (CDCl<sub>3</sub>) of MBDTC **3b** **(a)** <sup>1</sup>H-NMR spectrum (0.5-7.5 ppm, 500 MHz); **(b)** <sup>13</sup>C-NMR spectrum (0-220 ppm, 125 MHz). \*: Impurities.

**Figure S3:** Mass spectrum (Probe-MS, EI, 70 eV) of methylene-*bis*(di-*n*-decyl-dithiocarbamate) **3b**

**Figure S4:** Reference NMR spectra (CDCl<sub>3</sub>) of methylene-*bis*(dithiophosphate) **4** **(a)** <sup>1</sup>H-NMR spectrum (0.5-5.0 ppm, 500 MHz); **(b)** <sup>13</sup>C-NMR spectrum (0-210 ppm, 125 MHz). \*: Impurities.

**Figure S5:** **(a)** Extracted Ion Chromatogram (HPLC-MS, APPI, positive mode) and **(b)** Mass spectrum (HPLC-MS, APPI, positive mode) of methylene-*bis*(dithiophosphate) **4**

**Figure S6:** Mass spectrum (Probe-MS, EI, 70 eV) of methylene-*bis*(dithiophosphate) **4**

**Figure S7:** **(a)** Extracted Ion Chromatogram (HPLC-MS, APPI, positive mode, m/z: 804-817; 943-957) showing the distribution of MoDTC **1d** and **1e** formed in the ageing experiments involving MoDTC **1a-1c** (1 wt. %) and MBDTC **3a** (2 wt. %) in a hydrocarbon base oil under argon at 135 °C (Experiment 1, Table 1) after 15 h and **(b)** Mass spectrum (HPLC-MS, APPI, positive mode) of MoDTC **1d** and **1e**.

**Figure S8:** Visual aspect of the samples collected during the oil ageing experiment involving MoDTC **1a-1c** (1 wt. %), primary ZnDTP **2a** (1 wt. %) and MBDTC **3a** (2 wt. %) in a hydrocarbon base oil under argon bubbling at 135 °C (Experiment 2, Table 1) and showing the progressive formation of a yellowish precipitate.

**Figure S9:** Mass spectrum (Probe-MS, EI, 70 eV) obtained from the yellowish precipitate formed during the oil ageing experiment involving MoDTC **1a-1c** (1 wt. %), primary ZnDTP **2a** (1 wt. %) and MBDTC **3a** (2 wt. %) in a hydrocarbon base oil under argon bubbling at 135 °C

**Figure S10:** Evolution of the concentrations of **(a-c)** the mono-sulfurized MoDTC **1S-1d-1f** and **(d-f)** the di-sulfurized MoDTC **2S-1d-1f** during the experiments involving : (i) MoDTC **1a-1c** (1 wt. %), MBDTC **3a** (2 wt. %) and secondary ZnDTP **2b** (1 wt. %), (blue color; Experiment 3, Table 1) and (ii) MoDTC **1a-1c** (1 wt. %), MBDTC **3a** (2 wt. %) and primary ZnDTP **2a** (1 wt. %), (red color; Experiment 2, Table 1) in a lubricant base oil under argon bubbling at 135 °C. IS: internal standard. \*Y-axis: arbitrary units. Error bars correspond to triplicate HPLC-MS analyses of each sample.

**Figure S11:** Evolution with time of the percentage of sulfurized MoDTC (sum of **1S-1d-1f** and **2S-1d-1f**) relative to the total (regular + sulfurized) MoDTC (sum of **1a-1f**, **1S-1a-1f** and **2S-1a-1f**) during the experiment involving : (i) MoDTC **1a-1c** (1 wt. %), MBDTC **3a** (2 wt. %) and secondary ZnDTP **2b** (1 wt. %), (blue color; Experiment 3, Table 1) and (ii) MoDTC **1a-1c** (1 wt. %), MBDTC **3a** (2 wt. %) and primary ZnDTP **2a** (1 wt. %), (red color; Experiment 2, Table 1) in a lubricant base oil under argon bubbling at 135 °C.

**Figure S12:** **(a-c)** Extracted Ion Chromatogram (HPLC-MS, APPI) showing the distribution of residual MoDTC **1a-1c** and **(g-i)** their corresponding mass spectra; **(d-f)** Extracted Ion Chromatogram (HPLC-MS, APPI) showing the distributions of MoDTC **1g-1i** and **(j-l)** their corresponding mass spectra formed after 18 h in the oil ageing experiment involving MoDTC **1a-1c** (1 wt. %), MBDTC **3b** (2 wt. %) and primary ZnDTP **2a** (1 wt. %) in a hydrocarbon base oil under argon bubbling at 135 °C (Experiment 4, Table 1).

**Figure S13:** Visual aspect of the samples collected during the oil ageing experiment involving MoDTC **1a-1c** (1 wt. %), MBDTC **3b** (2 wt. %) and primary ZnDTP **2a** (1 wt. %) in a hydrocarbon base oil under argon bubbling at 135 °C (Experiment 4, Table 1) and showing the absence of precipitate.

**Figure S14:** **(a-g)** Extracted Ion Chromatogram (HPLC-MS, APPI) showing the distribution of newly-formed MoDTC bearing ligands with C<sub>4</sub> and/or C<sub>10</sub> alkyl chains and **(h-n)** their corresponding mass spectra after 18 h of the oil ageing experiment involving MoDTC **1a-1c** (1 wt. %), MBDTC **3a** (2 wt. %) and ZnDTC **5a** (1 wt. %) in a hydrocarbon base oil under argon bubbling at 135 °C (Experiment 5, Table 1).

**Figure S15:** Partial phosphorus-decoupled <sup>1</sup>H-NMR spectrum (3.0–5.5 ppm, 500 MHz, CDCl<sub>3</sub>) of the reference additive MBDTP **4**. \*: Impurities

**Figure S1:** Reference NMR spectra (CDCl<sub>3</sub>) of MBDTc **3a** (a) <sup>1</sup>H-NMR spectrum (0.5–7.5 ppm, 500 MHz); (b) <sup>13</sup>C-NMR spectrum (0–220 ppm, 125 MHz). \*: Impurities.

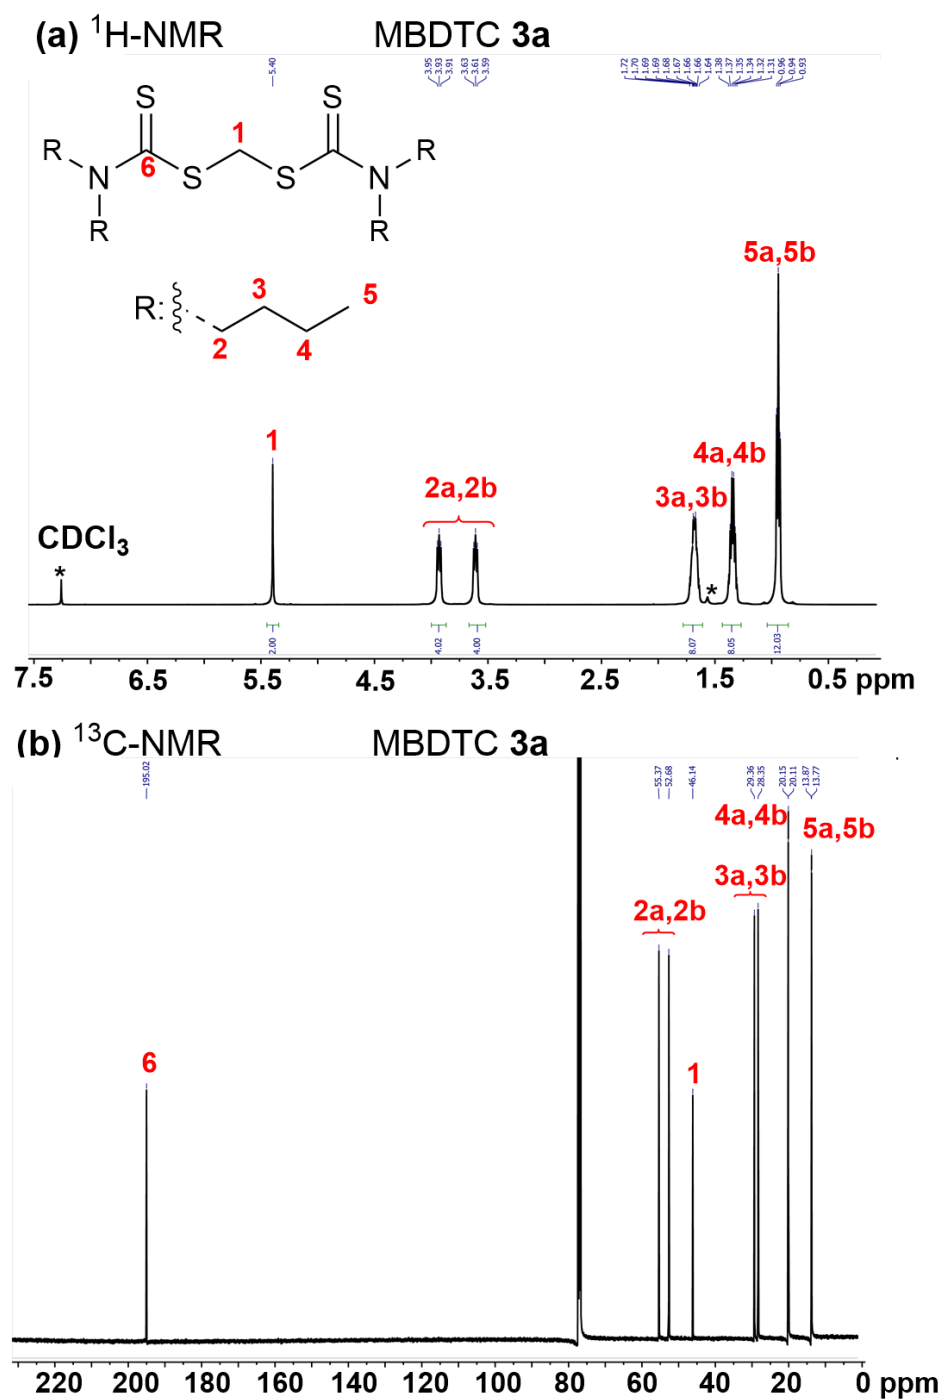

**Figure S2:** Reference NMR spectra ( $\text{CDCl}_3$ ) of MBDTc **3b** (a)  $^1\text{H}$ -NMR spectrum (0.5–7.5 ppm, 500 MHz); (b)  $^{13}\text{C}$ -NMR spectrum (0–220 ppm, 125 MHz). \*: Impurities.

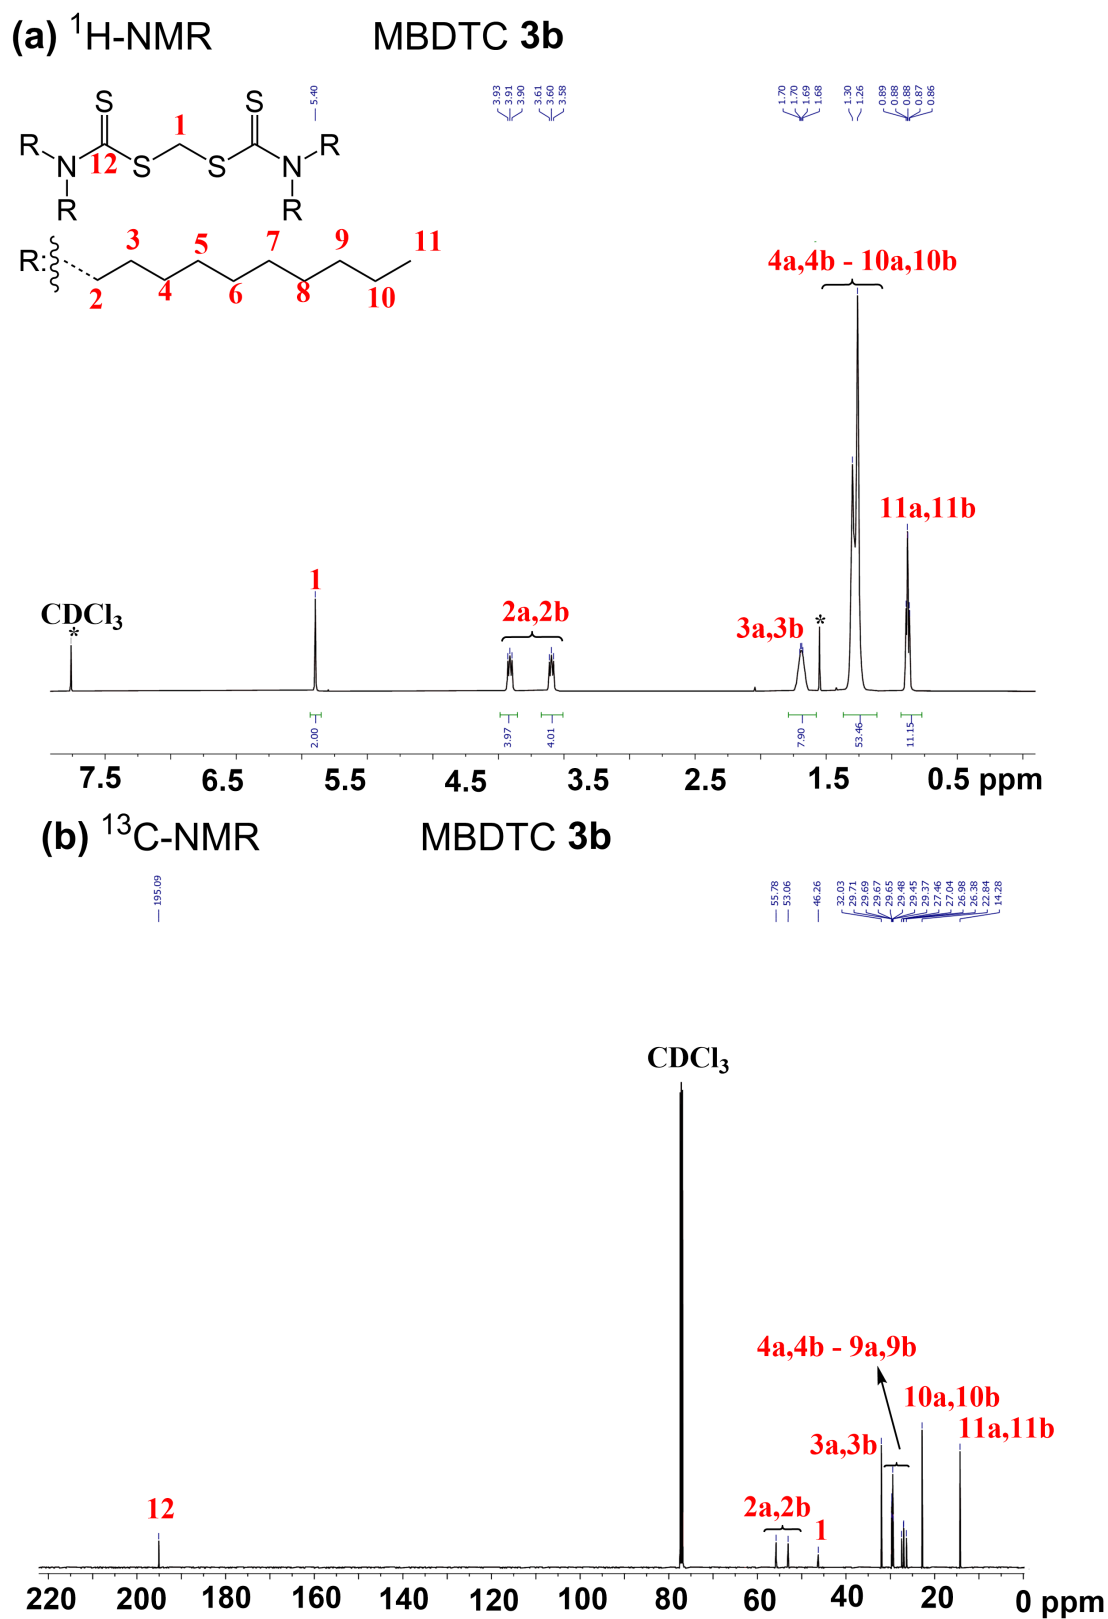

**Figure S3:** Mass spectrum (Probe-MS, EI, 70 eV) of methylene-*bis*(di-*n*-decyl-dithiocarbamate) **3b**

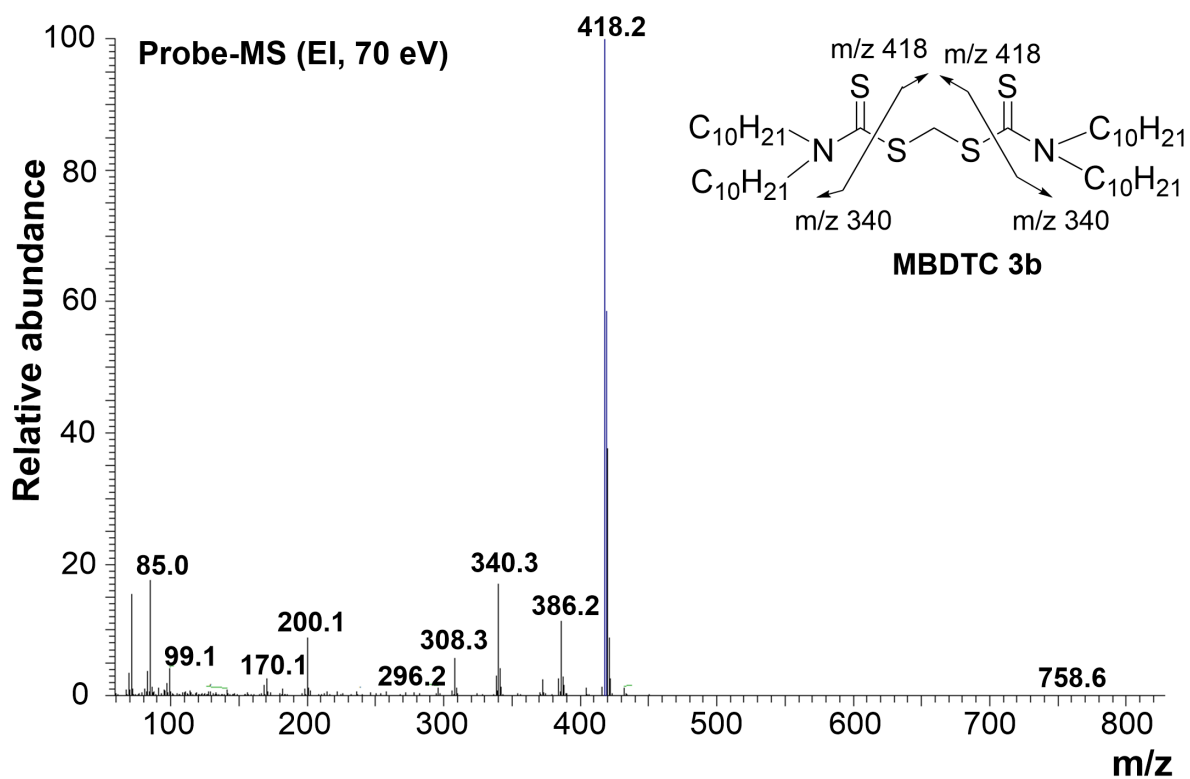

**Figure S4:** Reference NMR spectra (CDCl<sub>3</sub>) of methylene-*bis*(dithiophosphate) **4** (a) <sup>1</sup>H-NMR spectrum (0.5–5.0 ppm, 500 MHz); (b) <sup>13</sup>C-NMR spectrum (0–210 ppm, 125 MHz). \*: Impurities.

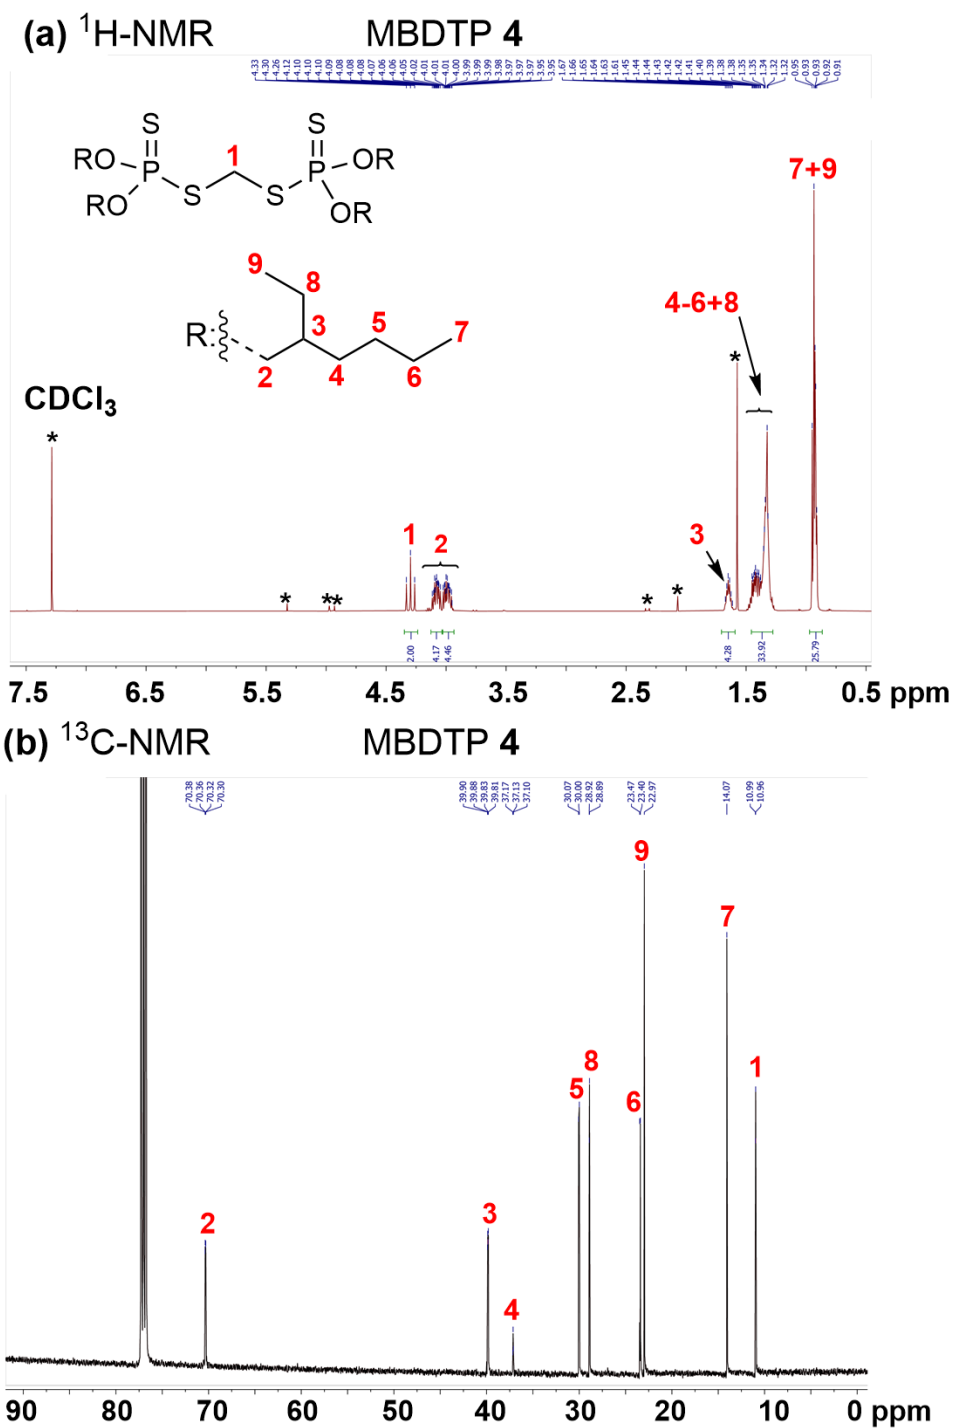

**Figure S5: (a)** Extracted Ion Chromatogram (HPLC-MS, APPI, positive mode) and **(b)** Mass spectrum (HPLC-MS, APPI, positive mode) of methylene-*bis*(dithiophosphate) **4**

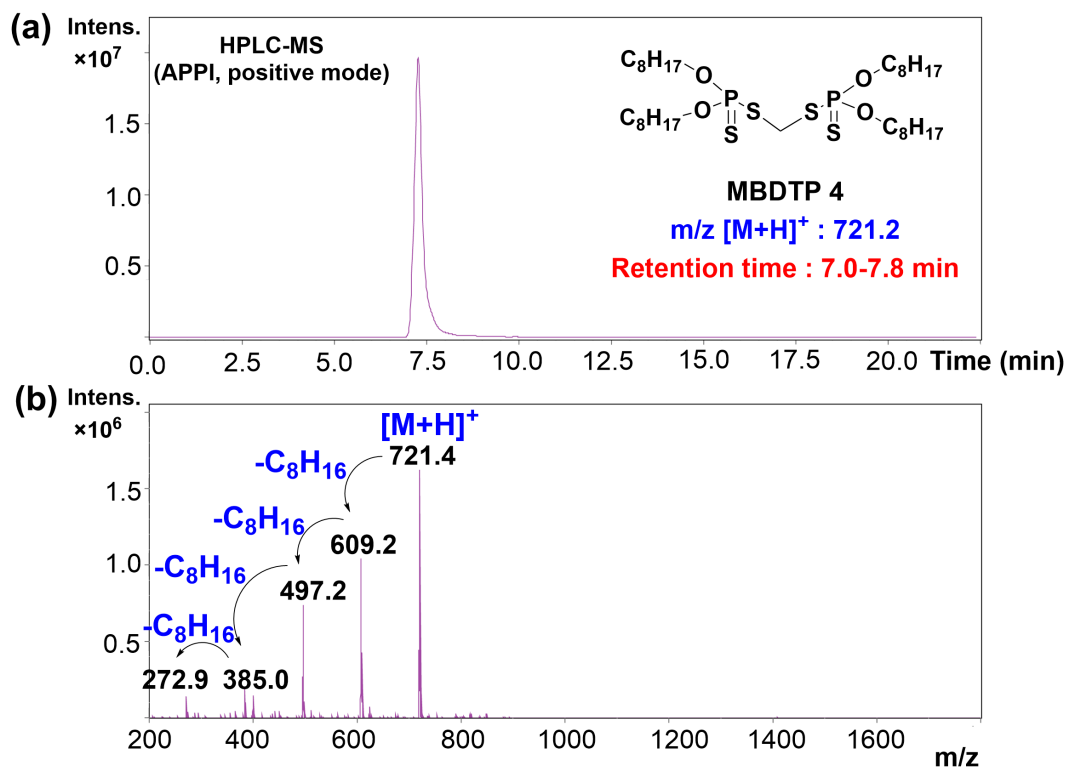

Figure S6: Mass spectrum (Probe-MS, EI, 70 eV) of methylene-*bis*(dithiophosphate) **4**

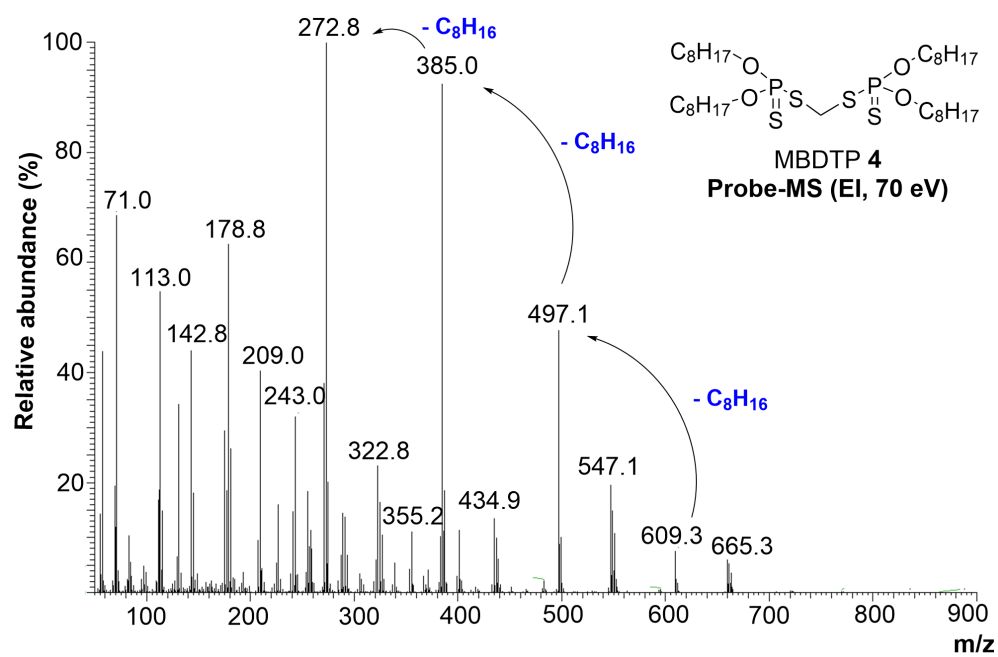



**Figure S7:** (a) Extracted Ion Chromatogram (HPLC-MS, APPI, positive mode,  $m/z$ : 804-817; 943-957) showing the distribution of MoDTC **1d** and **1e** formed in the ageing experiments involving MoDTC **1a-1c** (1 wt. %) and MBDTC **3a** (2 wt. %) in a hydrocarbon base oil under argon at 135 °C (Experiment 1, Table 1) after 15 h and (b) Mass spectrum (HPLC-MS, APPI, positive mode) of MoDTC **1d** and **1e**.

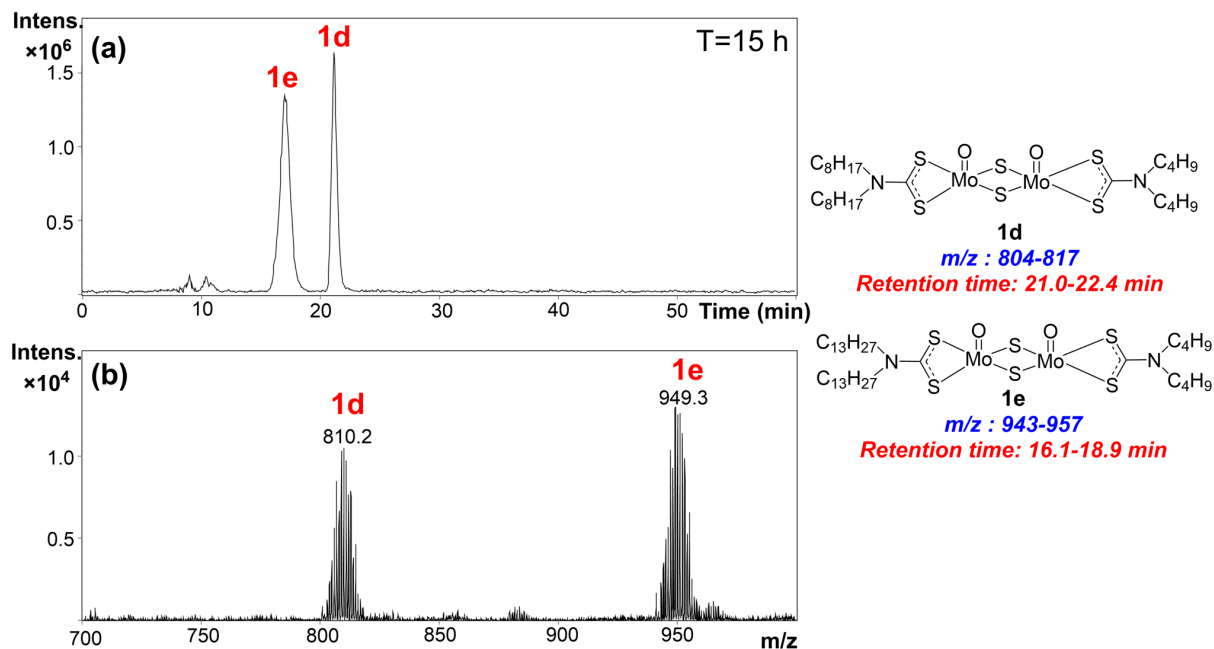

**Figure S8:** Visual aspect of the samples collected during the oil ageing experiment involving MoDTC **1a-1c** (1 wt. %), primary ZnDTP **2a** (1 wt. %) and MBDTC **3a** (2 wt. %) in a hydrocarbon base oil under argon bubbling at 135 °C (Experiment 2, Table 1) showing the progressive formation of a yellowish precipitate.

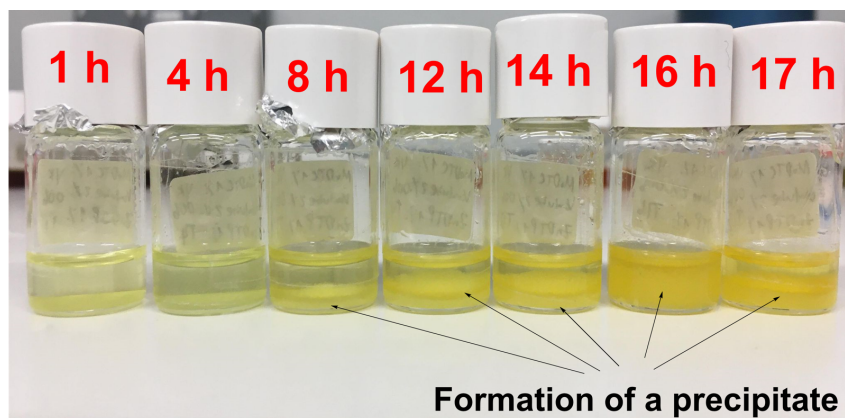

**Figure S9:** Mass spectrum (Probe-MS, EI, 70 eV) obtained from the yellowish precipitate formed during the oil ageing experiment involving MoDTC **1a-1c** (1 wt. %), primary ZnDTP **2a** (1 wt. %) and MBDTC **3a** (2 wt. %) in a hydrocarbon base oil under argon bubbling at 135 °C

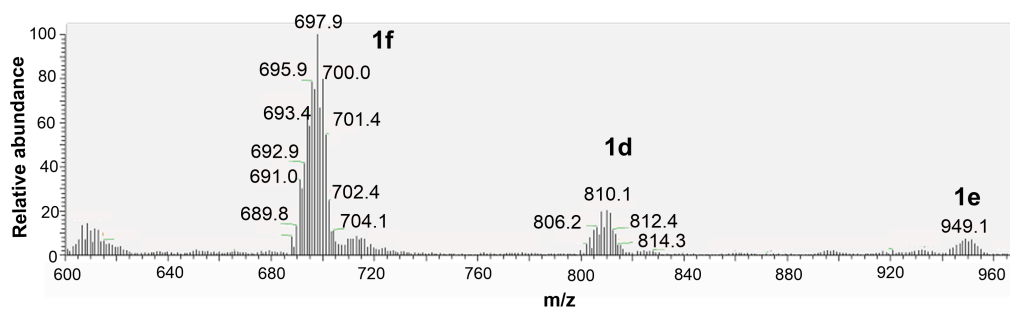

Probe-MS (EI, 70eV) : m/z (relative intensity) 693-700 ( $M^+$ , 100%), 943-957 (10), 804-817 (21)

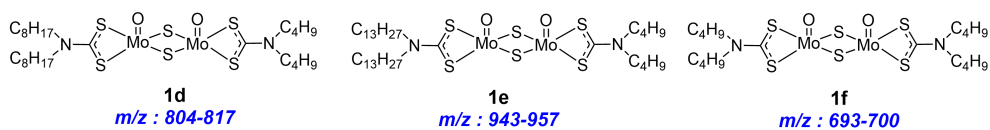

**Figure S10:** Evolution of the concentrations of **(a-c)** the mono-sulfurized MoDTC **1S-1d-1f** and **(d-f)** the di-sulfurized MoDTC **2S-1d-1f** during the experiments involving : (i) MoDTC **1a-1c** (1 wt. %), MBDTC **3a** (2 wt. %) and secondary ZnDTP **2b** (1 wt. %) (blue color; Experiment 3, Table 1) and (ii) MoDTC **1a-1c** (1 wt. %), MBDTC **3a** (2 wt. %) and primary ZnDTP **2a** (1 wt. %), (red color; Experiment 2, Table 1) in a lubricant base oil under argon bubbling at 135 °C. IS: internal standard. \*Y-axis: arbitrary units. Error bars correspond to triplicate HPLC-MS analyses of each sample.

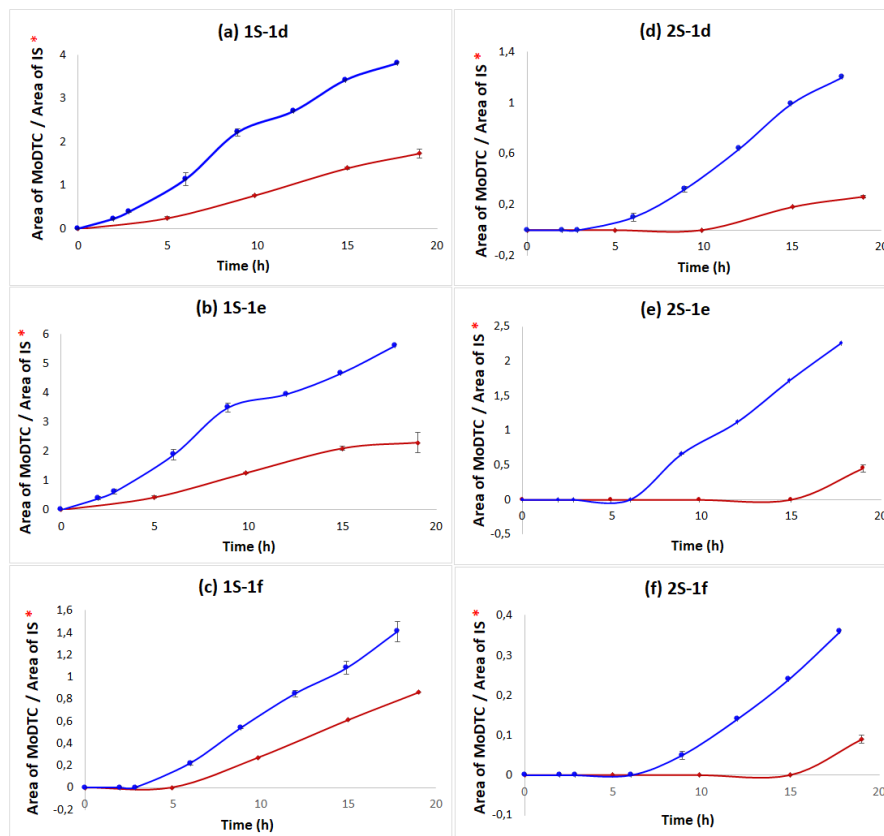

**Figure S11:** Evolution with time of the percentage of sulfurized MoDTC (sum of **1S-1d-1f** and **2S-1d-1f**) relative to the total (regular + sulfurized) MoDTC (sum of **1a-1f**, **1S-1a-1f** and **2S-1a-1f**) during the experiment involving : (i) MoDTC **1a-1c** (1 wt. %), MBDTC **3a** (2 wt. %) and secondary ZnDTP **2b** (1 wt. %) (blue color; Experiment 3, Table 1) and (ii) MoDTC **1a-1c** (1 wt. %), MBDTC **3a** (2 wt. %) and primary ZnDTP **2a** (1 wt. %) (red color; Experiment 2, Table 1) in a lubricant base oil under argon bubbling at 135 °C.

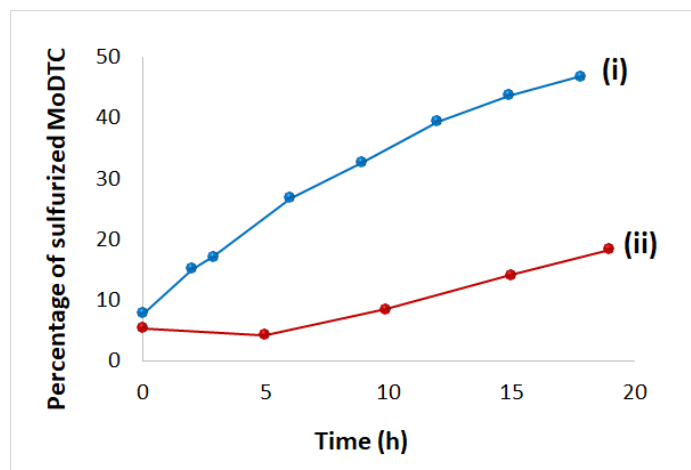

**Figure S12:** (a-c) Extracted Ion Chromatogram (HPLC-MS, APPI) showing the distribution of residual MoDTC **1a-1c** and (g-i) their corresponding mass spectra; (d-f) Extracted Ion Chromatogram (HPLC-MS, APPI) showing the distributions of MoDTC **1g-1i** and (j-l) their corresponding mass spectra formed after 18 h in the oil ageing experiment involving MoDTC **1a-1c** (1 wt. %), MBDTC **3b** (2 wt. %) and primary ZnDTP **2a** (1 wt. %) in a hydrocarbon base oil under argon bubbling at 135 °C (Experiment 4, Table 1).

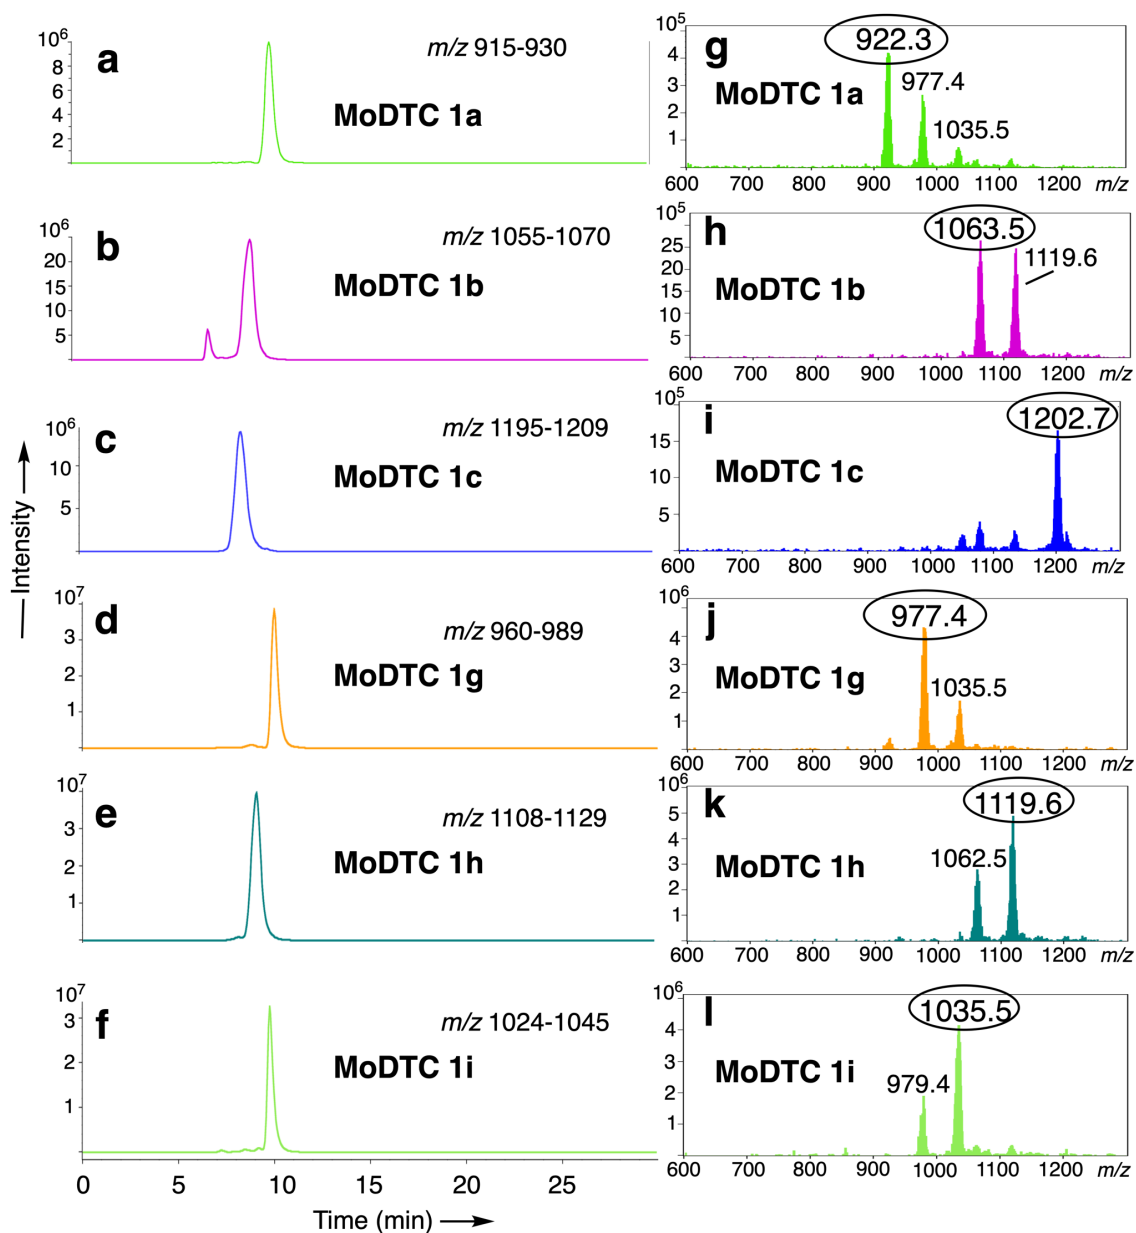

**Figure S13:** Visual aspect of the samples collected during the oil ageing experiment involving MoDTC **1a-1c** (1 wt. %), MBDTC **3b** (2 wt. %) and primary ZnDTP **2a** (1 wt. %) in a hydrocarbon base oil under argon bubbling at 135 °C (Experiment 4, Table 1) and showing the absence of precipitate.

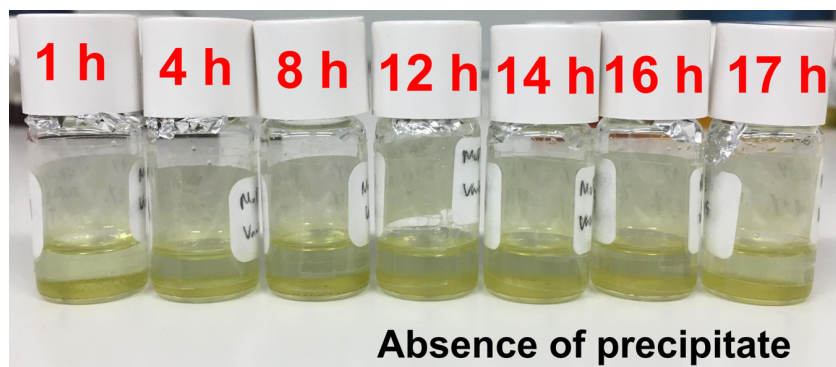

**Figure S14:** (a-g) Extracted Ion Chromatogram (HPLC-MS, APPI) showing the distribution of newly-formed MoDTC bearing ligands with C<sub>4</sub> and/or C<sub>10</sub> alkyl chains and (h-n) their corresponding mass spectra after 18 h of the oil ageing experiment involving MoDTC **1a-1c** (1 wt. %), MBDTC **3a** (2 wt. %) and ZnDTC **5a** (1 wt. %) in a hydrocarbon base oil under argon bubbling at 135 °C (Experiment 5, Table 1).

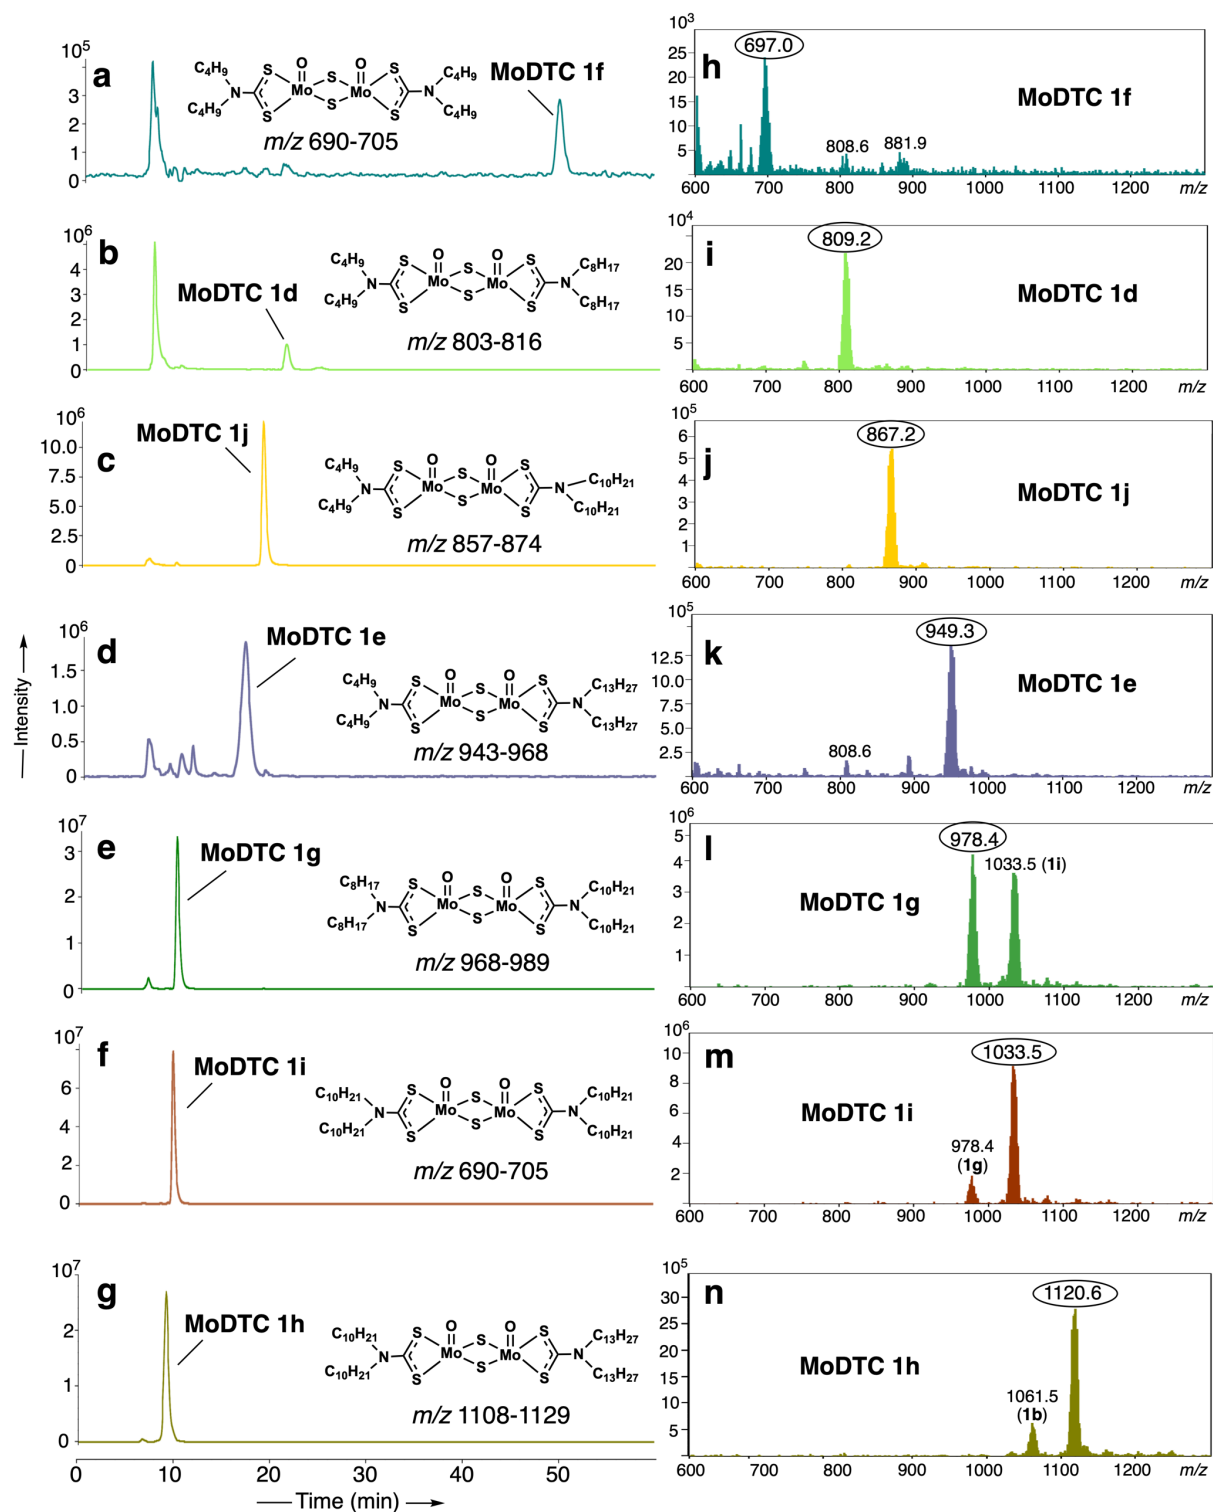



**Figure S15:** Partial phosphorus-decoupled  $^1\text{H}$ -NMR spectrum (3.0–5.5 ppm, 500 MHz,  $\text{CDCl}_3$ ) of the reference additive MBDTP **4**. \*: Impurities

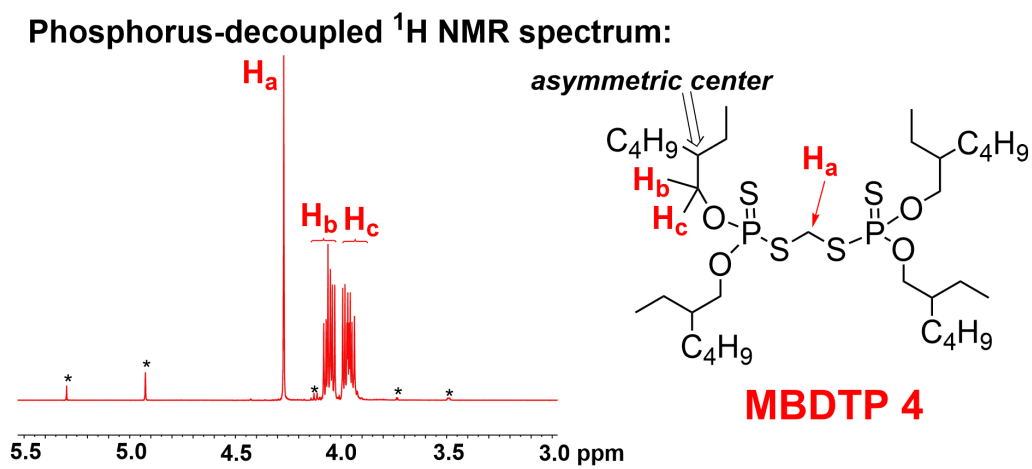

Supplement: d2nj04123e1.pdf [file d2nj04123e1.pdf]
